# Supplementary material
Source: PubMed Central journal article supplement (PMC4073430)
Supplement: ASN.2013070713_ASN2013070713SupplementaryData.pdf [file ASN.2013070713_ASN2013070713SupplementaryData.pdf]

**Supplementary Table 1: Characteristics of participants by quartiles of IL-18 standardized to UCr**

|                                                     | IL18 standardized to UCr (pg/mg) |                   |                    |                    | p-value | All                  |
|-----------------------------------------------------|----------------------------------|-------------------|--------------------|--------------------|---------|----------------------|
|                                                     | Q1                               | Q2                | Q3                 | Q4                 |         |                      |
| Range                                               | 3 – 18                           | 19 – 31           | 32 – 55            | 56 – 84,848        |         |                      |
| N                                                   | 754                              | 752               | 750                | 754                |         | 3010                 |
| Age (years)                                         | 73.5 (2.8)                       | 73.7 (2.8)        | 73.6 (2.9)         | 73.7 (3.0)         | 0.624   | 73.6 (2.9)           |
| Male                                                | 517 (69)                         | 447 (59)          | 317 (42)           | 186 (25)           | <0.001  | 1467 (49)            |
| Race/Ethnicity                                      |                                  |                   |                    |                    |         |                      |
| White                                               | 391 (52)                         | 447 (59)          | 458 (61)           | 468 (62)           | <0.001  | 1764 (59)            |
| Black                                               | 363 (48)                         | 305 (41)          | 292 (39)           | 286 (38)           |         | 1246 (41)            |
| Site                                                |                                  |                   |                    |                    |         |                      |
| Memphis                                             | 359 (48)                         | 357 (48)          | 373 (50)           | 415 (55)           | 0.003   | 1504 (50)            |
| Pittsburgh                                          | 395 (52)                         | 395 (53)          | 377 (50)           | 339 (45)           |         | 1506 (50)            |
| Education                                           |                                  |                   |                    |                    |         |                      |
| < HS                                                | 209 (28)                         | 190 (25)          | 172 (23)           | 185 (25)           | 0.919   | 756 (25)             |
| HS Grad                                             | 222 (30)                         | 227 (30)          | 266 (36)           | 264 (35)           |         | 979 (33)             |
| Postsecondary                                       | 322 (43)                         | 334 (45)          | 307 (41)           | 304 (40)           |         | 1267 (42)            |
| Diabetes                                            | 184 (25)                         | 169 (23)          | 170 (24)           | 178 (25)           | 0.905   | 701 (24)             |
| Hypertension                                        | 510 (68)                         | 484 (64)          | 499 (67)           | 499 (66)           | 0.774   | 1992 (66)            |
| SBP mm Hg                                           | 135 (21)                         | 135 (21)          | 137 (20)           | 136 (22)           | 0.174   | 136 (21)             |
| Smoking                                             |                                  |                   |                    |                    |         |                      |
| Never                                               | 289 (38)                         | 282 (38)          | 352 (47)           | 387 (51)           | <0.001  | 1310 (44)            |
| Former                                              | 85 (11)                          | 71 (10)           | 75 (10)            | 79 (11)            |         | 310 (10)             |
| Current                                             | 380 (50)                         | 397 (53)          | 321 (43)           | 287 (38)           |         | 1385 (46)            |
| Prevalent HF                                        | 26 (4)                           | 25 (3)            | 22 (3)             | 20 (3)             | 0.321   | 93 (3)               |
| Prevalent CHD                                       | 182 (25)                         | 171 (23)          | 145 (20)           | 145 (20)           | 0.005   | 643 (22)             |
| CRP*                                                | 1.54 [0.92,2.87]                 | 1.58 [0.97,2.92]  | 1.79 [1.03,3.44]   | 1.89 [1.09,3.40]   | <0.001  | 1.68<br>[0.99, 3.13] |
| Albumin (g/dl)                                      | 3.98 (0.32)                      | 3.99 (0.32)       | 3.99 (0.31)        | 3.96 (0.32)        | 0.225   | 3.98 (0.31)          |
| LDL (mg/dl)                                         | 122 (34)                         | 123 (33)          | 120 (34)           | 121 (37)           | 0.377   | 122 (35)             |
| HDL (mg/dl)                                         | 52 (16)                          | 52 (16)           | 55 (17)            | 57 (18)            | <0.001  | 54 (17)              |
| eGFR <sub>cys</sub> (ml/min/1.73 m <sup>2</sup> )   | 77 (20)                          | 78 (21)           | 78 (20)            | 82 (23)            | <0.001  | 79 (21)              |
| eGFR <sub>cys</sub> < 60 ml/min/1.73 m <sup>2</sup> | 158 (21)                         | 130 (17)          | 110 (15)           | 111 (15)           | <0.001  | 509 (17%)            |
| UACR* mg/g                                          | 6.58 [3.50,17.00]                | 7.58 [4.30,17.72] | 8.52 [4.74, 20.33] | 10.57 [6.03,26.64] | <0.001  | 8.26<br>[4.55,20.31] |
| UACR >30 mg/g                                       | 124 (16)                         | 122 (16)          | 134 (18)           | 178 (24)           | <0.001  | 558 (19)             |

Data are presented as mean (SD), n (%) or \*median [IQR]. HF=heart failure. SBP=systolic blood pressure. CRP=C-reactive protein. LDL=low density lipoprotein cholesterol. HDL=high density lipoprotein cholesterol. HS=high school

**Supplementary Table 2: Characteristics of participants by quartiles of ACR (mg/g)**

|                                                        | ACR              |                  |                   |                      | p-value | All                  |
|--------------------------------------------------------|------------------|------------------|-------------------|----------------------|---------|----------------------|
|                                                        | Q1               | Q2               | Q3                | Q4                   |         |                      |
| Range                                                  | 0.5 – 4.6 mg/g   | 4.7 – 8.3 mg/g   | 8.4 – 20.3 mg/g   | 20.4 – 38,720 mg/g   |         |                      |
| N                                                      | 754              | 752              | 754               | 750                  |         | 3010                 |
| Age (years)                                            | 73.3 (2.7)       | 73.5 (2.8)       | 73.8 (3.0)        | 73.9 (3.0)           | <0.001  | 73.6 (2.9)           |
| Male                                                   | 396 (53)         | 340 (45)         | 329 (44)          | 402 (54)             | 0.846   | 1467 (49)            |
| Race/Ethnicity                                         |                  |                  |                   |                      |         |                      |
| White                                                  | 457 (61)         | 470 (63)         | 459 (61)          | 378 (50)             | <0.001  | 1764 (59)            |
| Black                                                  | 297 (39)         | 282 (38)         | 295 (39)          | 372 (50)             |         | 1246 (41)            |
| Site                                                   |                  |                  |                   |                      |         |                      |
| Memphis                                                | 385 (51)         | 384 (51)         | 358 (48)          | 377 (50)             | 0.463   | 1504 (50)            |
| Pittsburgh                                             | 369 (49)         | 368 (49)         | 396 (53)          | 373 (50)             |         | 1506 (50)            |
| Education                                              |                  |                  |                   |                      |         |                      |
| < HS                                                   | 180 (24)         | 193 (26)         | 173 (23)          | 210 (28)             | 0.175   | 756 (25)             |
| HS Grad                                                | 233 (31)         | 260 (35)         | 257 (34)          | 229 (31)             |         | 979 (33)             |
| Postsecondary                                          | 338 (45)         | 298 (40)         | 323 (43)          | 308 (41)             |         | 1267 (42)            |
| Diabetes                                               | 126 (17)         | 134 (18)         | 159 (22)          | 282 (39)             | <0.001  | 701 (24)             |
| Hypertension                                           | 412 (55)         | 464 (62)         | 521 (69)          | 595 (79)             | <0.001  | 1992 (66)            |
| SBP mm Hg                                              | 131 (18)         | 133 (19)         | 137 (21)          | 142 (23)             | <0.001  | 136 (21)             |
| Smoking                                                |                  |                  |                   |                      |         |                      |
| Never                                                  | 319 (42)         | 341 (45)         | 336 (45)          | 314 (42)             | 0.612   | 1310 (44)            |
| Former                                                 | 73 (10)          | 61 (8)           | 79 (11)           | 97 (13)              |         | 310 (10)             |
| Current                                                | 360 (48)         | 350 (47)         | 337 (45)          | 338 (45)             |         | 1385 (46)            |
| Prevalent HF                                           | 11 (2)           | 14 (2)           | 19 (3)            | 49 (7)               | <0.001  | 93 (3)               |
| Prevalent CHD                                          | 136 (18)         | 144 (20)         | 153 (21)          | 210 (29)             | <0.001  | 643 (22)             |
| CRP*                                                   | 1.59 [0.94,2.83] | 1.67 [1.01,3.05] | 1.64 [1.01,3.09]  | 1.85 [1.04,3.72]     | 0.001   | 1.68<br>[0.99, 3.13] |
| Albumin (g/dl)                                         | 3.93 (0.31)      | 3.99 (0.31)      | 4.01 (0.31)       | 3.99 (0.33)          | <0.001  | 3.98 (0.31)          |
| LDL (mg/dl)                                            | 121 (33)         | 125 (34)         | 123 (36)          | 118 (36)             | 0.070   | 122 (35)             |
| HDL (mg/dl)                                            | 54 (16)          | 55 (17)          | 56 (18)           | 52 (17)              | 0.156   | 54 (17)              |
| eGFR <sub>cys</sub><br>(ml/min/1.73 m <sup>2</sup> )   | 81 (19)          | 81 (19)          | 81 (20)           | 73 (25)              | <0.001  | 79 (21)              |
| eGFR <sub>cys</sub> < 60<br>ml/min/1.73 m <sup>2</sup> | 81 (11)          | 97 (13)          | 107 (14)          | 224 (30)             | <0.001  | 509 (17)             |
| UACR* mg/g                                             | 3.05 [2.22,3.76] | 6.13 [5.34,7.08] | 12.3 [9.86,15.21] | 49.70 [29.43,118.70] | <0.001  | 8.26<br>[4.55,20.31] |
| UACR >30 mg/g                                          | 0 (0)            | 0 (0)            | 0 (0)             | 558 (19)             | <0.001  | 558 (19)             |

Data are presented as mean (SD), n (%) or \*median [IQR]. HF=heart failure. SBP=systolic blood pressure. CRP=C-reactive protein. LDL=low density lipoprotein cholesterol. HDL=high density lipoprotein cholesterol. HS=high school

**Supplementary Table 3. Association of KIM-1, IL-18 and UACR with progression of kidney disease defined as  $\Delta eGFR-CysC$  (continuous using linear mixed models)**

|                                          | Unadjusted          | Demographic adjusted* | Risk factor adjusted** | Adjusted for ACR    |
|------------------------------------------|---------------------|-----------------------|------------------------|---------------------|
|                                          | $\beta$ (95% CI)    | $\beta$ (95% CI)      | $\beta$ (95% CI)       | $\beta$ (95% CI)    |
| <b>KIM 1 standardized to UCr (ng/mg)</b> |                     |                       |                        |                     |
| Continuous (per doubling)                | 0.03 (-0.04, 0.11)  | 0.03 (-0.04,0.11)     | 0.04 (-0.04, 0.12)     | 0.09 (0.01, 0.18)   |
| Quartiles                                |                     |                       |                        |                     |
| < 497                                    | 1.00 (ref)          | 1.00 (ref)            | 1.00 (ref)             | 1.00 (ref)          |
| 497 – 814                                | 0.08 (-0.18, 0.33)  | 0.06 (-0.20, 0.32)    | 0.04 (-0.21, 0.28)     | 0.04 (-0.21, 0.29)  |
| 815 – 1239                               | 0.10 (-0.14, 0.35)  | 0.08 (-0.17, 0.34)    | 0.11 (-0.15, 0.36)     | 0.13 (-0.13, 0.38)  |
| $\geq 1240$                              | -0.10 (-0.34, 0.15) | -0.12 (-0.38, 0.14)   | -0.07 (-0.33, 0.19)    | -0.02 (-0.29, 0.25) |
| <b>IL-18 standardized to UCr pg/mg</b>   |                     |                       |                        |                     |
| Continuous (per doubling)                | -0.001 (-0.07,0.07) | -0.02 (-0.09,0.06)    | 0.005 (-0.07, 0.08)    | 0.05 (-0.04,0.13)   |
| Quartiles                                |                     |                       |                        |                     |
| < 19                                     | 1.00 (ref)          | 1.00 (ref)            | 1.00 (ref)             | 1.00 (ref)          |
| 19 – 31                                  | 0.10 (-0.15,0.34)   | 0.08 (-0.17,0.33)     | 0.12 (-0.12,0.36)      | 0.14 (-0.10,0.38)   |
| 32 – 55                                  | -0.08 (-0.39,0.17)  | -0.12 (-0.39,0.14)    | -0.08 (-0.33,0.18)     | -0.05 (-0.30,0.21)  |
| $\geq 56$                                | -0.05(-0.30,0.21)   | -0.12 (-0.40,0.16)    | 0.01 (-0.26,0.28)      | 0.08 (-0.20,0.35)   |
| <b>ACR (mg/g)</b>                        |                     |                       |                        |                     |
| Continuous (per doubling)                | -0.10 (-0.17,-0.39) | -0.10 (-0.17,-0.38)   | -0.08 (-0.14,-0.02)    | --                  |
| >30 vs <30 mg/g                          | -0.60 (-0.87,-0.34) | -0.60 (-0.86,-0.34)   | -0.51 (-0.78,-0.25)    | --                  |
| Quartiles                                |                     |                       |                        |                     |
| < 4.6                                    | 1.00 (ref)          | 1.00 (ref)            | 1.00 (ref)             | --                  |
| 4.6 – 8.3                                | -0.23 (-0.47,0.003) | -0.23 (-0.47,0.002)   | -0.20 (-0.43,0.03)     | --                  |
| 8.4 – 20.3                               | -0.27 (-0.50,-0.04) | -0.28 (-0.51,-0.05)   | -0.16 (-0.39,0.06)     | --                  |
| >20.3                                    | -0.54 (-0.81,-0.27) | -0.54 (-0.81,-0.27)   | -0.44 (-0.70,-0.17)    | --                  |

\*Adjusted for age, sex, race, site and education

\*\*further adjusted for diabetes, hypertension, SBP, smoking, prevalent HF, prevalent CHD, albumin and CRP

**Supplementary Table 4. Association of KIM-1, IL-18 and UACR with progression of kidney disease defined as  $\Delta eGFR-CysC > 3$  ml/min/1.73 m<sup>2</sup>**

|                                          | Unadjusted        | Demographic adjusted* | Risk factor adjusted** | Adjusted for ACR  |
|------------------------------------------|-------------------|-----------------------|------------------------|-------------------|
| <b>KIM 1 standardized to UCr (ng/mg)</b> |                   |                       |                        |                   |
| Continuous (per doubling)                | 0.98 (0.92, 1.07) | 1.04 (0.96, 1.13)     | 1.00 (0.91, 1.08)      | 0.92 (0.84, 1.01) |
| Quartiles                                |                   |                       |                        |                   |
| < 497                                    | 1.00 (ref)        | 1.00 (ref)            | 1.00 (ref)             | 1.00 (ref)        |
| 497 – 814                                | 1.05 (0.82, 1.35) | 1.12 (0.87, 1.44)     | 1.07 (0.83, 1.39)      | 1.04 (0.80, 1.35) |
| 815 – 1239                               | 0.98 (0.76, 1.26) | 1.14 (0.88, 1.49)     | 1.04 (0.80, 1.37)      | 0.98 (0.75, 1.28) |
| ≥ 1240                                   | 1.07 (0.83, 1.37) | 1.29 (0.98, 1.69)     | 1.10 (0.83, 1.45)      | 0.95 (0.71, 1.26) |
| <b>IL-18 standardized to UCr pg/mg</b>   |                   |                       |                        |                   |
| Continuous (per doubling)                | 1.00 (0.93, 1.07) | 1.03 (0.96, 1.10)     | 1.02 (0.95, 1.10)      | 0.97 (0.90, 1.05) |
| Quartiles                                |                   |                       |                        |                   |
| < 19                                     | 1.00 (ref)        | 1.00 (ref)            | 1.00 (ref)             | 1.00 (ref)        |
| 19 – 31                                  | 0.93 (0.72, 1.20) | 0.96 (0.75, 1.25)     | 0.97 (0.75, 1.26)      | 0.94 (0.72, 1.22) |
| 32 – 55                                  | 1.01 (0.79, 1.31) | 1.12 (0.86, 1.45)     | 1.10 (0.85, 1.44)      | 1.06 (0.81, 1.38) |
| ≥ 56                                     | 1.05 (0.82, 1.35) | 1.18 (0.90, 1.55)     | 1.16 (0.88, 1.52)      | 1.04 (0.79, 1.38) |
| <b>ACR (mg/g)</b>                        |                   |                       |                        |                   |
| Continuous (per doubling)                | 1.16 (1.11, 1.22) | 1.15 (1.10, 1.20)     | 1.13 (1.08, 1.19)      | --                |
| >30 vs <30 mg/g                          | 1.90 (1.52, 2.37) | 1.80 (1.43, 2.25)     | 1.66 (1.31, 2.10)      | --                |
| Quartiles                                |                   |                       |                        |                   |
| < 4.6                                    | 1.00 (ref)        | 1.00 (ref)            | 1.00 (ref)             | --                |
| 4.6 – 8.3                                | 1.30 (1.00, 1.68) | 1.31 (1.01, 1.71)     | 1.32 (1.01, 1.72)      | --                |
| 8.4 – 20.3                               | 1.31 (1.01, 1.70) | 1.33 (1.03, 1.74)     | 1.33 (1.02, 1.74)      | --                |
| >20.3                                    | 2.01 (1.55, 2.59) | 1.92 (1.48, 2.48)     | 1.76 (1.34, 2.30)      | --                |

\*Adjusted for age, sex, race, site and education

\*\*further adjusted for diabetes, hypertension, SBP, smoking, prevalent HF, prevalent CHD, albumin and CRP

**Supplementary Table 5. Association of KIM-1/cr with mortality in models adjusted for serum bicarbonate, parathyroid hormone, phosphorus and hemoglobin**

|                                          | <b>Demo &amp; Risk factor adjusted*</b> | <b>Further adjusted for ACR and eGFR</b> | <b>Further adjusted for HCO<sub>3</sub>, PTH, phos and Hgb</b> |
|------------------------------------------|-----------------------------------------|------------------------------------------|----------------------------------------------------------------|
| <b>KIM 1 standardized to UCr (ng/mg)</b> |                                         |                                          |                                                                |
| Quartiles                                |                                         |                                          |                                                                |
| < 497                                    | 1.00 (ref)                              | 1.00 (ref)                               | 1.00 (ref)                                                     |
| 497 – 814                                | 1.08 (0.89, 1.31)                       | 1.07 (0.88, 1.30)                        | 1.08 (0.89, 1.32)                                              |
| 815 – 1239                               | 1.12 (0.91, 1.37)                       | 1.08 (0.88, 1.32)                        | 1.08 (0.89, 1.37)                                              |
| ≥ 1240                                   | 1.33 (1.09, 1.62)                       | 1.20 (0.98, 1.47)                        | 1.18 (0.96, 1.54)                                              |

\*Adjusted for age, sex, race, site and education, diabetes, hypertension, SBP, smoking, prevalent HF, prevalent CHD, albumin and CRP

**Supplementary Table 6. Association of KIM-1/cr with mortality in additional analyses adjusted for hemoglobin A1C and time dependent changes in systolic blood pressure.**

|                                          | <b>Demo, Risk factor and kidney function adjusted*</b> | <b>Additional adjustment for HbA1c</b> | <b>Additional adjustment for time dependent SBP</b> |
|------------------------------------------|--------------------------------------------------------|----------------------------------------|-----------------------------------------------------|
| <b>KIM 1 standardized to UCr (ng/mg)</b> |                                                        |                                        |                                                     |
| Quartiles                                |                                                        |                                        |                                                     |
| < 497                                    | 1.00 (ref)                                             | 1.00 (ref)                             | 1.00 (ref)                                          |
| 497 – 814                                | 1.19 (1.01, 1.39)                                      | 1.19 (1.01, 1.40)                      | 1.24 (1.06, 1.45)                                   |
| 815 – 1239                               | 1.12 (0.95, 1.33)                                      | 1.12 (0.95, 1.33)                      | 1.13 (0.96, 1.33)                                   |
| ≥ 1240                                   | 1.28 (1.08, 1.47)                                      | 1.28 (1.08, 1.51)                      | 1.35 (1.14, 1.60)                                   |

\*Adjusted for age, sex, race, site and education, diabetes, hypertension, SBP, smoking, prevalent HF, prevalent CHD, albumin and CRP
